# Supplementary material for: Tight Control of Hypoxia-inducible Factor-α Transient Dynamics Is Essential for Cell Survival in Hypoxia
Source: PubMed Central journal article supplement (PMC3937633; doi:10.1074/jbc.m113.500405), 2014-01-06
Supplement: supp_M113.500405_jbc.M113.500405-1.pdf [file supp_M113.500405_jbc.M113.500405-1.pdf]

# Supplemental material S1

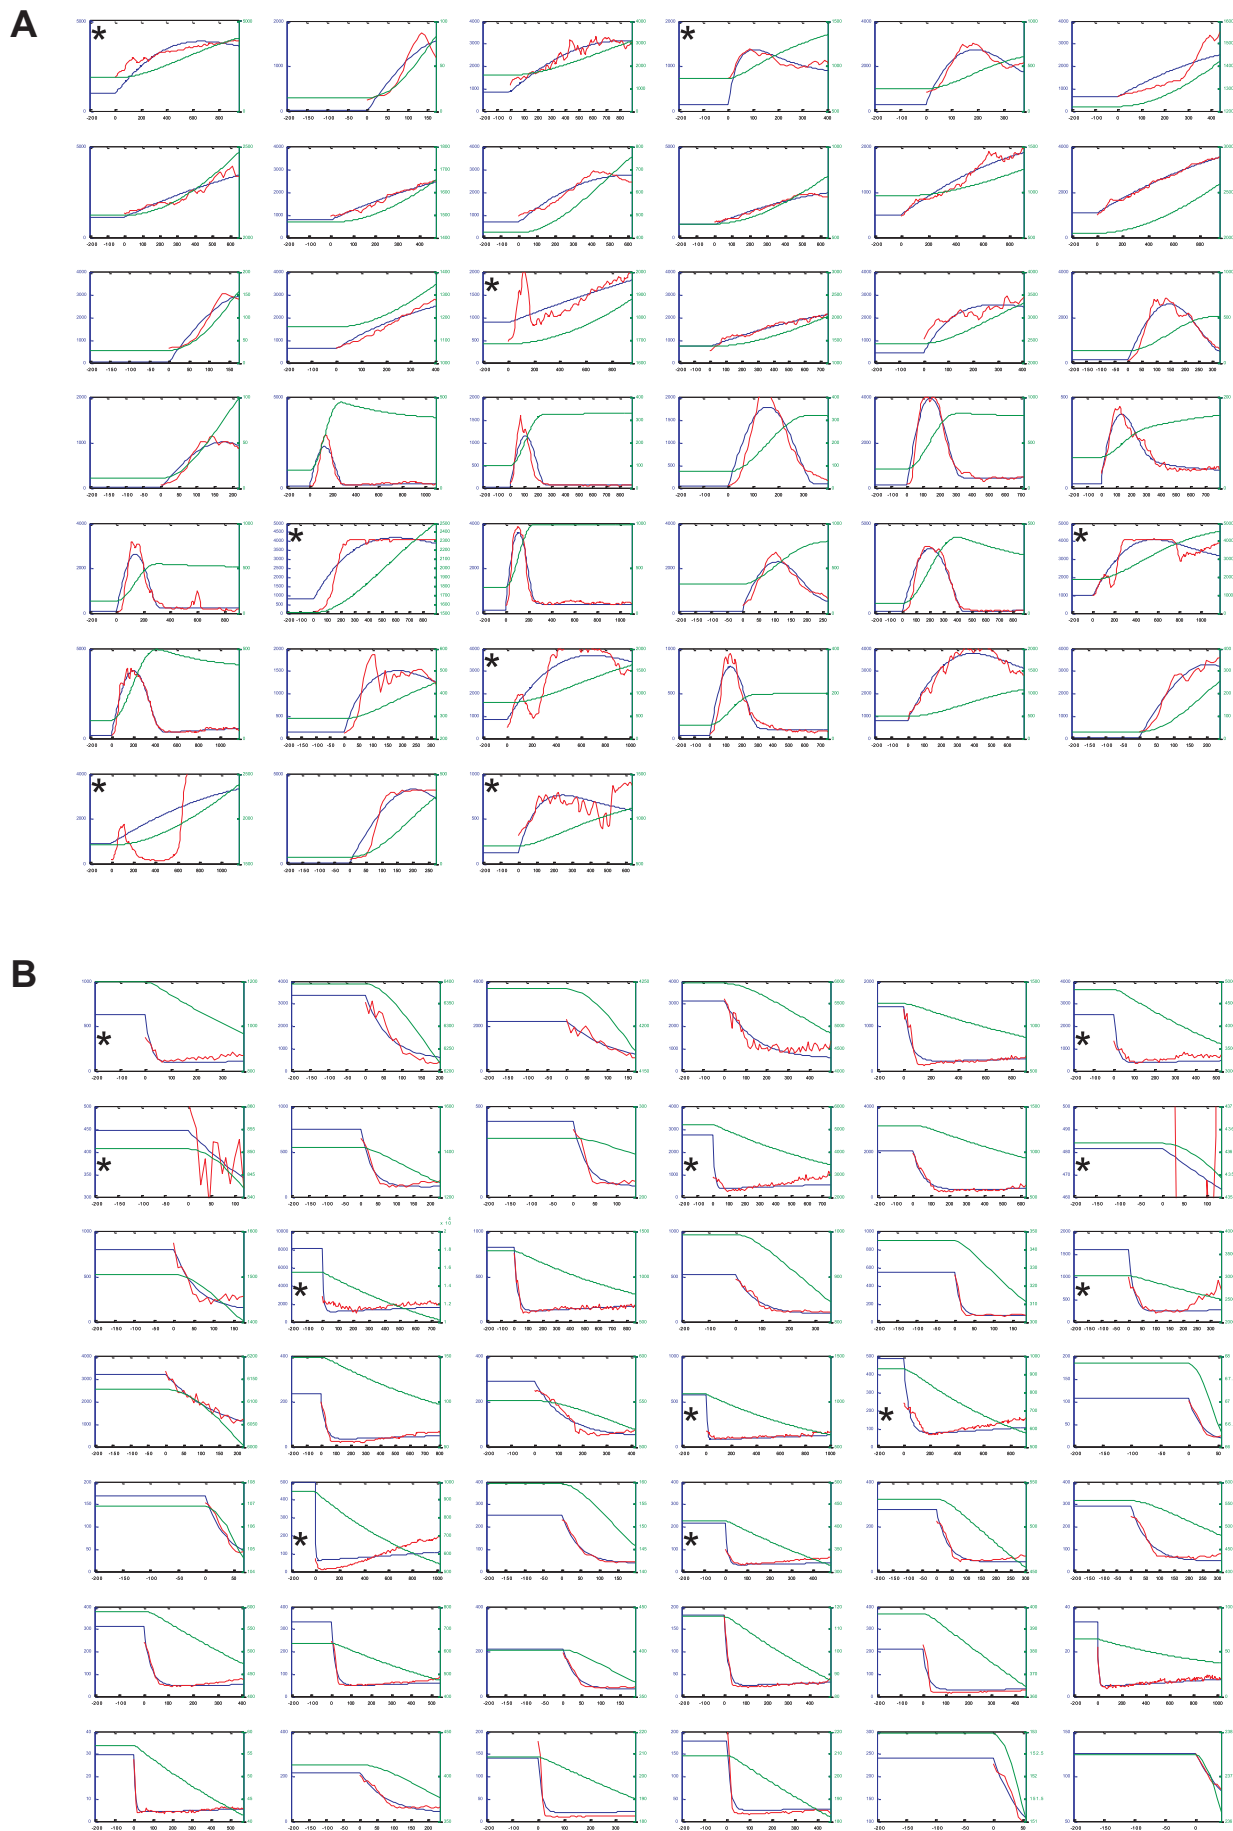

**Fig S1: Computational fit of single cell imaging traces.**

Single cells traces of HIF dynamics (blue line) that were fitted computationally using the model described in Fig 2 of the main manuscript (HIF, red line; PHD, green line). The \* highlight the cells that could not be fitted appropriately with the 2 component model (see material and methods section) **A**. Cells are initially at equilibrium in normoxia ( $h=1$ ) and are de-oxygenated into hypoxia ( $h=0.14$ ) at  $t=0$ . **B**. Cells are initially at equilibrium in hypoxia ( $h=0.14$ ) and are re-oxygenated back into normoxia ( $h=1$ ) at  $t=0$ .

## Supplemental movies

**movie 1:** HeLa cells were plated on a glass bottom dish and transfected with HIF-1 $\alpha$ -EGFP 24h hours before imaging . Cells were then placed onto the microscope stage and imaged every 5 min as indicated in the main manuscript. Cells were initially imaged at 20.8%O<sub>2</sub> for several frames before switching to 1%O<sub>2</sub> for 20h. The movie is accelerated to 30 frames/sec.

**movie 2:** HeLa cells were plated on a glass bottom dish and transfected with EGFP-HIF-2 $\alpha$  24h hours before imaging . Cells were then placed onto the microscope stage and imaged every 5 min as indicated in the main manuscript. Cells were initially imaged at 20.8%O<sub>2</sub> for several frames before switching to 1%O<sub>2</sub> for 15h. The movie is accelerated to 30 frames/sec.
